# Supplementary material for: Understanding activity origin for the oxygen reduction reaction on bi-atom catalysts by DFT studies and machine-learning
Source: Royal Society of Chemistry journal article supplement (doi:10.1039/d0ta08004g), 2020-01-01
Supplement: d0ta08004g1.pdf [file d0ta08004g1.pdf]

## Supporting Information

### Understanding Activity Origin for Oxygen Reduction Reaction on Bi-Atom Catalysts by DFT Study and Machine-Learning

Chaofang Deng<sup>[a, b]</sup>, Yang Su<sup>[b]</sup>, Fuhua Li<sup>[b]</sup>, Weifeng Shen<sup>[b]</sup>, Zhongfang Chen<sup>\*, [c]</sup> and  
Qing Tang<sup>\*, [b]</sup>

<sup>[a]</sup> Cooperative Innovation Center of Lipid Resources and Children's Daily Chemicals,  
Chongqing University of Education, Chongqing 400067, China

<sup>[b]</sup> School of Chemistry and Chemical Engineering, Chongqing Key Laboratory of  
Theoretical and Computational Chemistry, Chongqing University, Chongqing 401331,  
China

<sup>[c]</sup> Department of Chemistry, University of Puerto Rico, Rio Piedras, San Juan, PR  
00931, USA

\* To whom correspondence should be addressed. E-mail: [zhongfangchen@gmail.com](mailto:zhongfangchen@gmail.com);  
[qingtang@cqu.edu.cn](mailto:qingtang@cqu.edu.cn).

## Computational details

The detailed pathway for associative mechanism in ORR was adopted in our work as the following four steps:

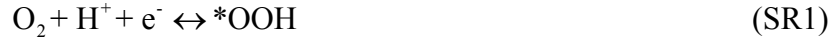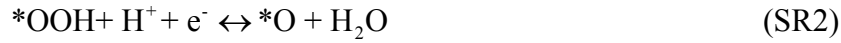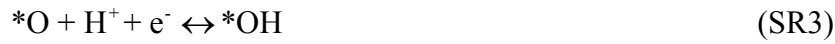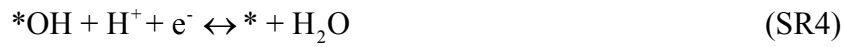

Accordingly, considering the effect of electrode potential ( $U$ ), the reaction free energy of SR1-SR4 can be calculated by:

$$\Delta G_1 = G_{\text{*OOH}} - G_{\text{*O}_2} - 0.5G_{\text{H}_2} + eU \quad (\text{S1a})$$

$$\Delta G_2 = G_{\text{*O}} + G_{\text{H}_2\text{O}} - G_{\text{*OOH}} - 0.5G_{\text{H}_2} + eU \quad (\text{S1b})$$

$$\Delta G_3 = G_{\text{*OH}} - G_{\text{*O}} - 0.5G_{\text{H}_2} + eU \quad (\text{S1c})$$

$$\Delta G_4 = G_{\text{H}_2\text{O}} + G_{\text{*}} - G_{\text{*OH}} - 0.5G_{\text{H}_2} + eU \quad (\text{S1d})$$

Owing to the high-spin ground state of the  $\text{O}_2$  molecule, it is poorly described in DFT computations. To avoid calculating energy of  $\text{O}_2$ , we first calculated reaction free energy of equations of S2a-S2c.

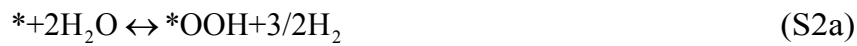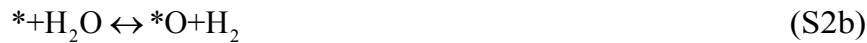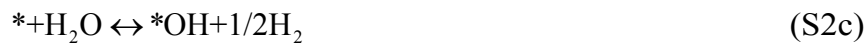

Then, the reaction free energy of equations of S2a-S2c can be defined as:

$$\Delta G_{\text{*OOH}} = 1.5G_{\text{*H}_2} + G_{\text{*OOH}} - 2G_{\text{H}_2\text{O}} - G_{\text{*}} \quad (\text{S3a})$$

$$\Delta G_{*O} = G_{*H_2} + G_{*O} - G_{H_2O} - G_* \quad (S3b)$$

$$\Delta G_{*OH} = 0.5G_{*H_2} + G_{*OH} - G_{H_2O} - G_* \quad (S3c)$$

At the equilibrium potential of 1.23 V, the reaction free energy of  $O_2 + 4H^+ + 4e^- \leftrightarrow 2H_2O$  is 4.92 eV. Therefore,  $\Delta G_1$  can be determined by  $\Delta G_1 = 4.92 - (\Delta G_2 + \Delta G_3 + \Delta G_4)$ . Combining with equations S3a-S3c, the reaction free energy of SR1-SR4 can be represented by:

$$\Delta G_1 = \Delta G_{*OOH} - 4.92 + eU \quad (S4a)$$

$$\Delta G_2 = \Delta G_{*O} - \Delta G_{*OOH} + eU \quad (S4b)$$

$$\Delta G_3 = \Delta G_{*OH} - \Delta G_{*O} + eU \quad (S4c)$$

$$\Delta G_4 = -\Delta G_{*OH} + eU \quad (S4d)$$

Based on above analysis, the elementary reaction of SR1-SR4 can be expressed by the adsorption free energies of OOH ( $\Delta G_{*OOH}$ ), O ( $\Delta G_{*O}$ ) and OH ( $\Delta G_{*OH}$ ).

The detailed pathway for dissociative mechanisms in ORR was adopted in our work as the following five steps:

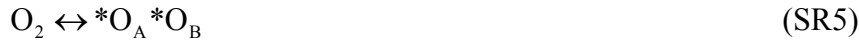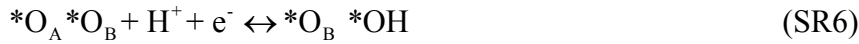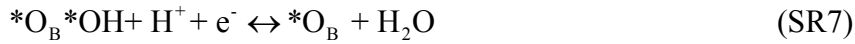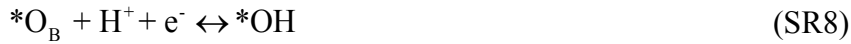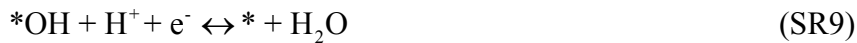

Similarly, the reaction free energy of SR5-SR8 can be represented by:

$$\Delta G_1' = \Delta G_{*O_A *O_B} - 4.92 \quad (S5a)$$

$$\Delta G'_2 = \Delta G_{*O_B *OH} - \Delta G_{*O_A *O_B} + eU \quad (\text{S5b})$$

$$\Delta G'_3 = \Delta G_{*O_B} - \Delta G_{*O_B *OH} + eU \quad (\text{S5c})$$

$$\Delta G'_4 = \Delta G_{*OH} - \Delta G_{*O_B} + eU \quad (\text{S5d})$$

$$\Delta G'_5 = -\Delta G_{*OH} + eU \quad (\text{S5e})$$

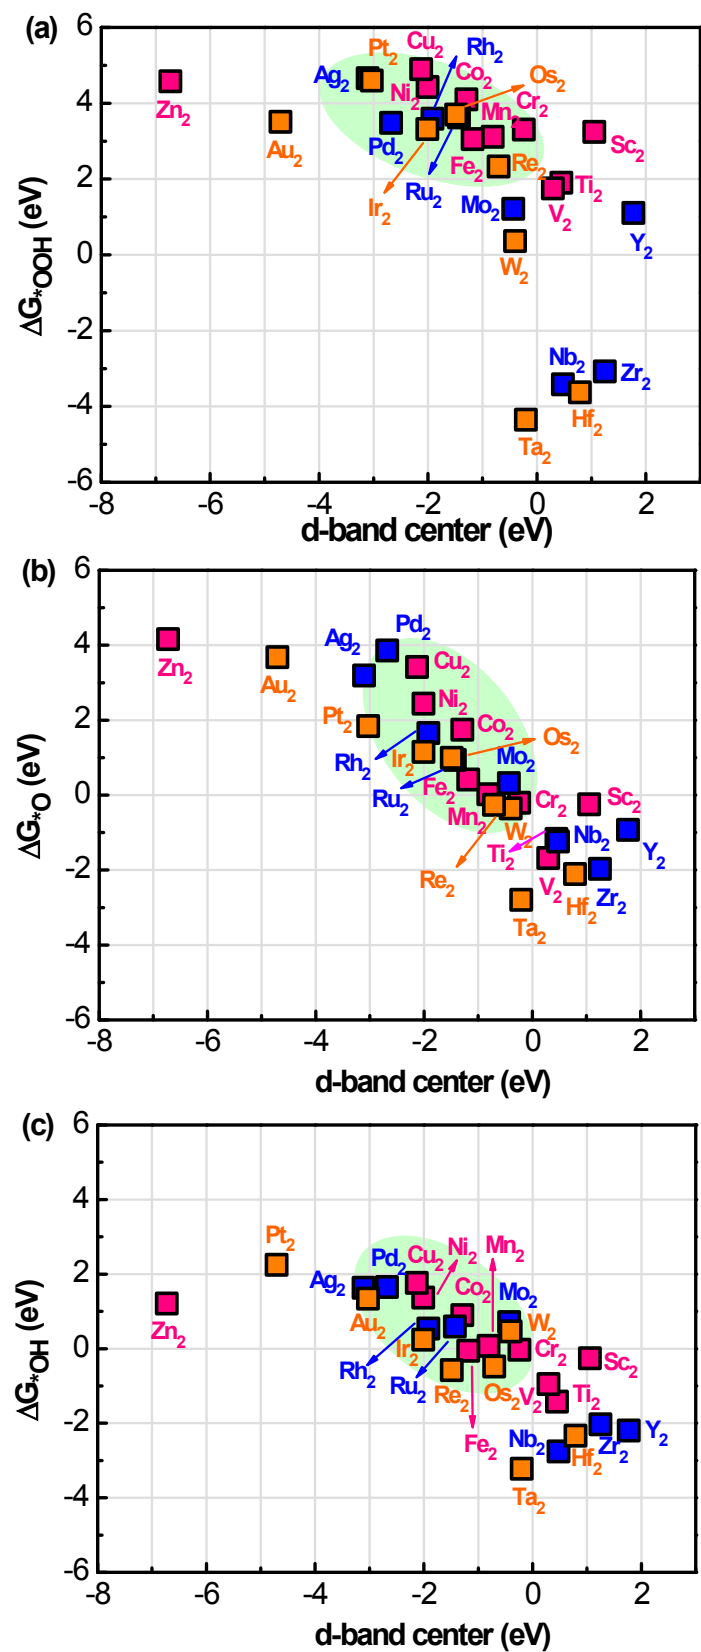

Figure S1. Correlations between adsorption free energy of oxygenated intermediates (\*OOH, \*O and \*OH) and the d-band center of metal dimer in BACs.

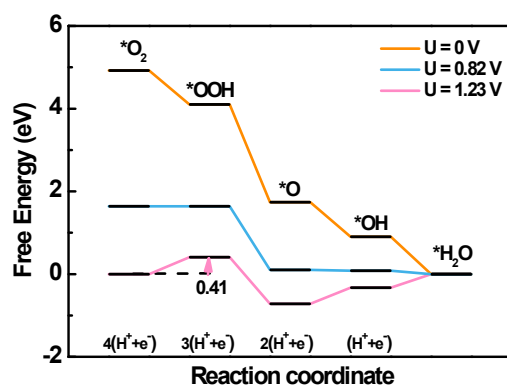

Figure S2. The reaction free energy diagrams at three different potentials for homonuclear  $\text{Co}_2/\text{NC}$  BACs.

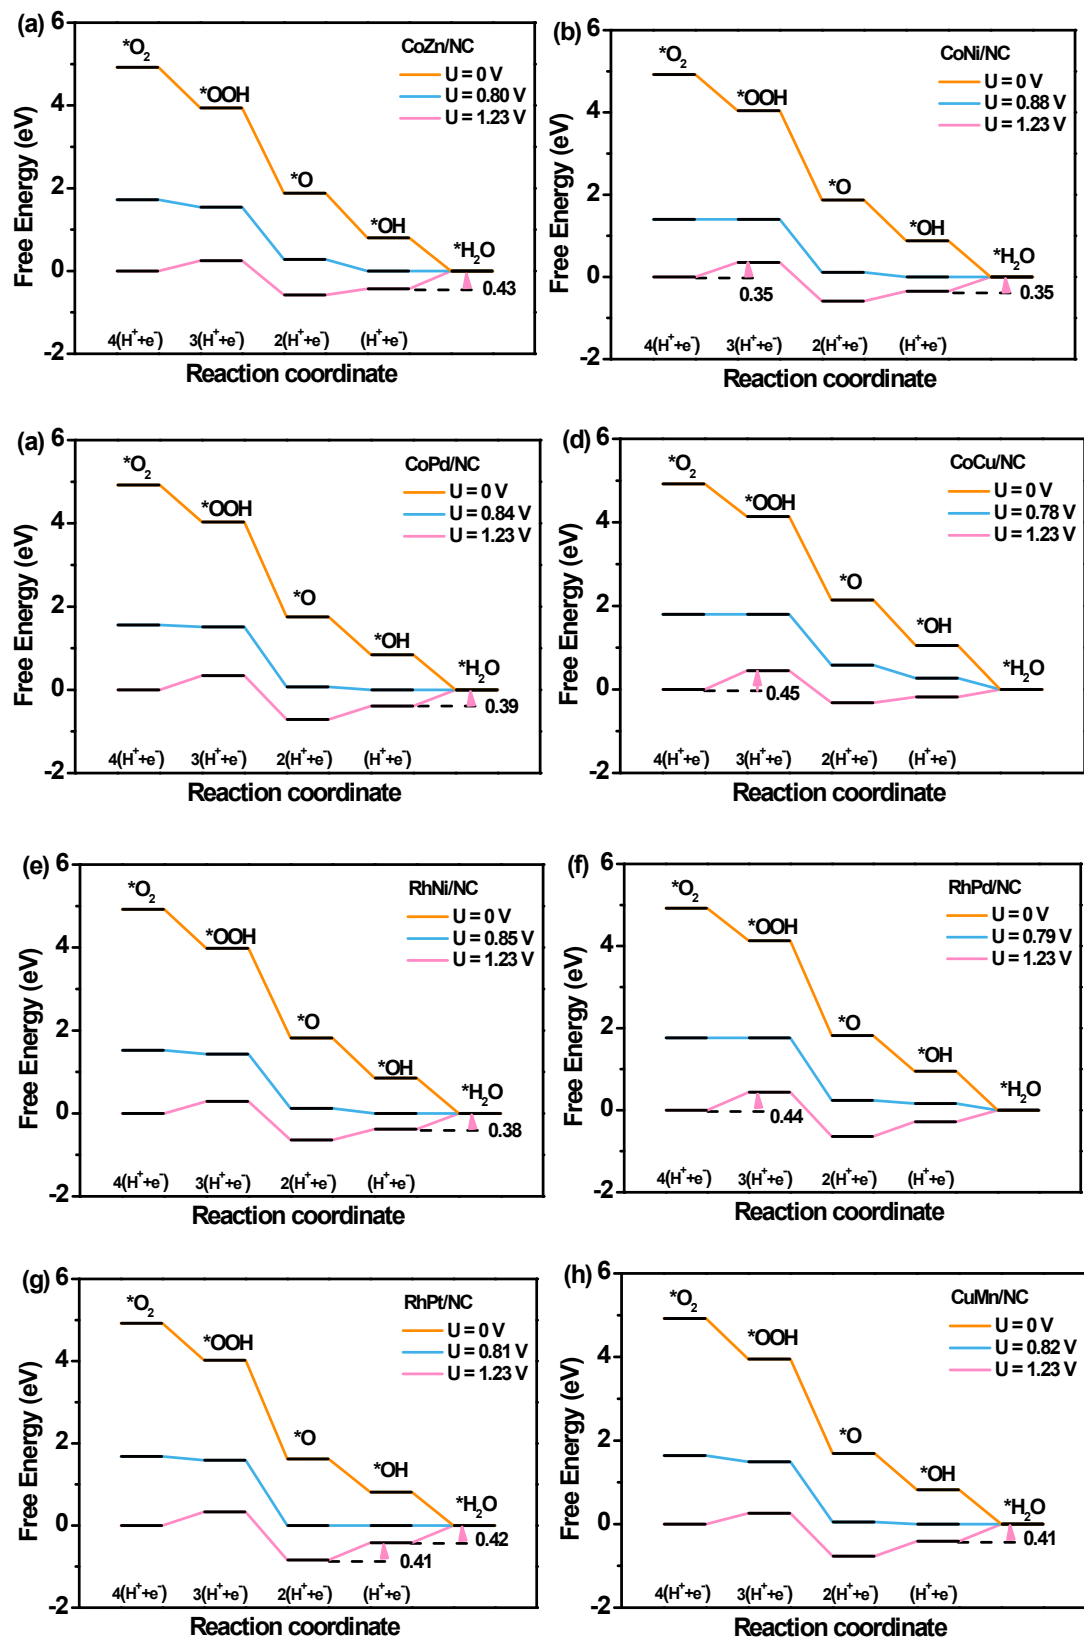

Figure S3. The reaction free energy diagrams at three different potentials for the 8 screened out promising heteronuclear BACs.

Table S1. Adsorption free energy (in eV) of oxygenated intermediates (associative mechanism) on different homonuclear BACs and the corresponding limiting potential (in V).

| Catalysts           | $\Delta G^*_{\text{OOH}}$ | $\Delta G^*_{\text{O}}$ | $\Delta G^*_{\text{OH}}$ | $U_L$       |
|---------------------|---------------------------|-------------------------|--------------------------|-------------|
| Sc <sub>2</sub> /NC | 3.24                      | -0.25                   | -0.26                    | -0.26       |
| Ti <sub>2</sub> /NC | 1.90                      | -1.17                   | -1.42                    | -1.42       |
| V <sub>2</sub> /NC  | 1.75                      | -1.68                   | -0.95                    | -0.95       |
| Cr <sub>2</sub> /NC | 3.30                      | -0.21                   | -0.03                    | -0.17       |
| Mn <sub>2</sub> /NC | 3.11                      | 0.02                    | 0.07                     | -0.05       |
| Fe <sub>2</sub> /NC | 3.05                      | 0.41                    | -0.06                    | -0.06       |
| Co <sub>2</sub> /NC | 4.10                      | 1.74                    | 0.90                     | <b>0.82</b> |
| Ni <sub>2</sub> /NC | 4.43                      | 2.44                    | 1.37                     | 0.49        |
| Cu <sub>2</sub> /NC | 4.90                      | 3.42                    | 1.76                     | 0.02        |
| Zn <sub>2</sub> /NC | 4.58                      | 4.16                    | 1.21                     | 0.34        |
| Y <sub>2</sub> /NC  | 1.10                      | -0.93                   | -2.20                    | -2.20       |
| Zr <sub>2</sub> /NC | -3.08                     | -1.97                   | -2.03                    | -2.03       |
| Nb <sub>2</sub> /NC | -3.42                     | -1.24                   | -2.76                    | -2.76       |
| Mo <sub>2</sub> /NC | 1.21                      | 0.32                    | 0.71                     | -0.39       |
| Ru <sub>2</sub> /NC | 3.62                      | 0.94                    | 0.59                     | 0.35        |
| Rh <sub>2</sub> /NC | 3.59                      | 1.65                    | 0.54                     | 0.54        |
| Pd <sub>2</sub> /NC | 4.66                      | 3.19                    | 1.63                     | 0.26        |
| Ag <sub>2</sub> /NC | 3.48                      | 3.86                    | 1.65                     | -0.38       |
| Hf <sub>2</sub> /NC | -3.63                     | -2.11                   | -2.34                    | -2.34       |
| Ta <sub>2</sub> /NC | -4.35                     | -2.80                   | -3.22                    | -3.22       |
| W <sub>2</sub> /NC  | 0.36                      | -0.36                   | 0.46                     | -0.82       |
| Re <sub>2</sub> /NC | 2.33                      | -0.26                   | -0.48                    | -0.48       |
| Os <sub>2</sub> /NC | 3.70                      | 0.99                    | -0.58                    | -0.58       |
| Ir <sub>2</sub> /NC | 3.32                      | 1.15                    | 0.24                     | 0.24        |
| Pt <sub>2</sub> /NC | 4.60                      | 1.84                    | 1.34                     | 0.32        |
| Au <sub>2</sub> /NC | 3.51                      | 3.68                    | 2.25                     | -0.17       |



Table S2. Adsorption free energy (in eV) of oxygenated intermediates (dissociative mechanism) on different homonuclear BACs and the corresponding limiting potential (in V).

| Catalysts           | $\Delta G_{*O*O}$ | $\Delta G_{*O*OH}$ | $\Delta G_{*O}$ | $\Delta G_{*OH}$ | $U_L$ |
|---------------------|-------------------|--------------------|-----------------|------------------|-------|
| Sc <sub>2</sub> /NC | 0.89              | -1.81              | -0.25           | -0.26            | -1.56 |
| Ti <sub>2</sub> /NC | -2.36             | -2.48              | -1.17           | -1.42            | -1.42 |
| V <sub>2</sub> /NC  | -2.46             | -2.10              | -1.68           | -0.95            | -0.95 |
| Cr <sub>2</sub> /NC | -1.91             | -2.03              | -0.21           | -0.03            | -1.82 |
| Y <sub>2</sub> /NC  | 1.13              | -1.53              | -0.93           | -2.20            | -2.20 |
| Zr <sub>2</sub> /NC | -3.56             | -3.23              | -1.97           | -2.03            | -2.03 |
| Nb <sub>2</sub> /NC | -3.73             | -3.57              | -1.24           | -2.76            | -2.76 |
| Mo <sub>2</sub> /NC | -0.52             | 0.00               | 0.32            | 0.71             | -0.52 |
| Ru <sub>2</sub> /NC | 1.97              | 0.93               | 0.94            | 0.59             | -0.01 |
| Hf <sub>2</sub> /NC | -4.06             | -3.78              | -2.11           | -2.34            | -2.34 |
| Ta <sub>2</sub> /NC | -4.75             | -4.50              | -2.80           | -3.22            | -3.22 |
| W <sub>2</sub> /NC  | -2.18             | -1.53              | -0.36           | 0.46             | -1.17 |
| Re <sub>2</sub> /NC | -0.10             | -0.39              | -0.26           | -0.48            | -0.48 |

Table S3. The adsorption geometry of ORR intermediates on the 8 optimal catalysts.

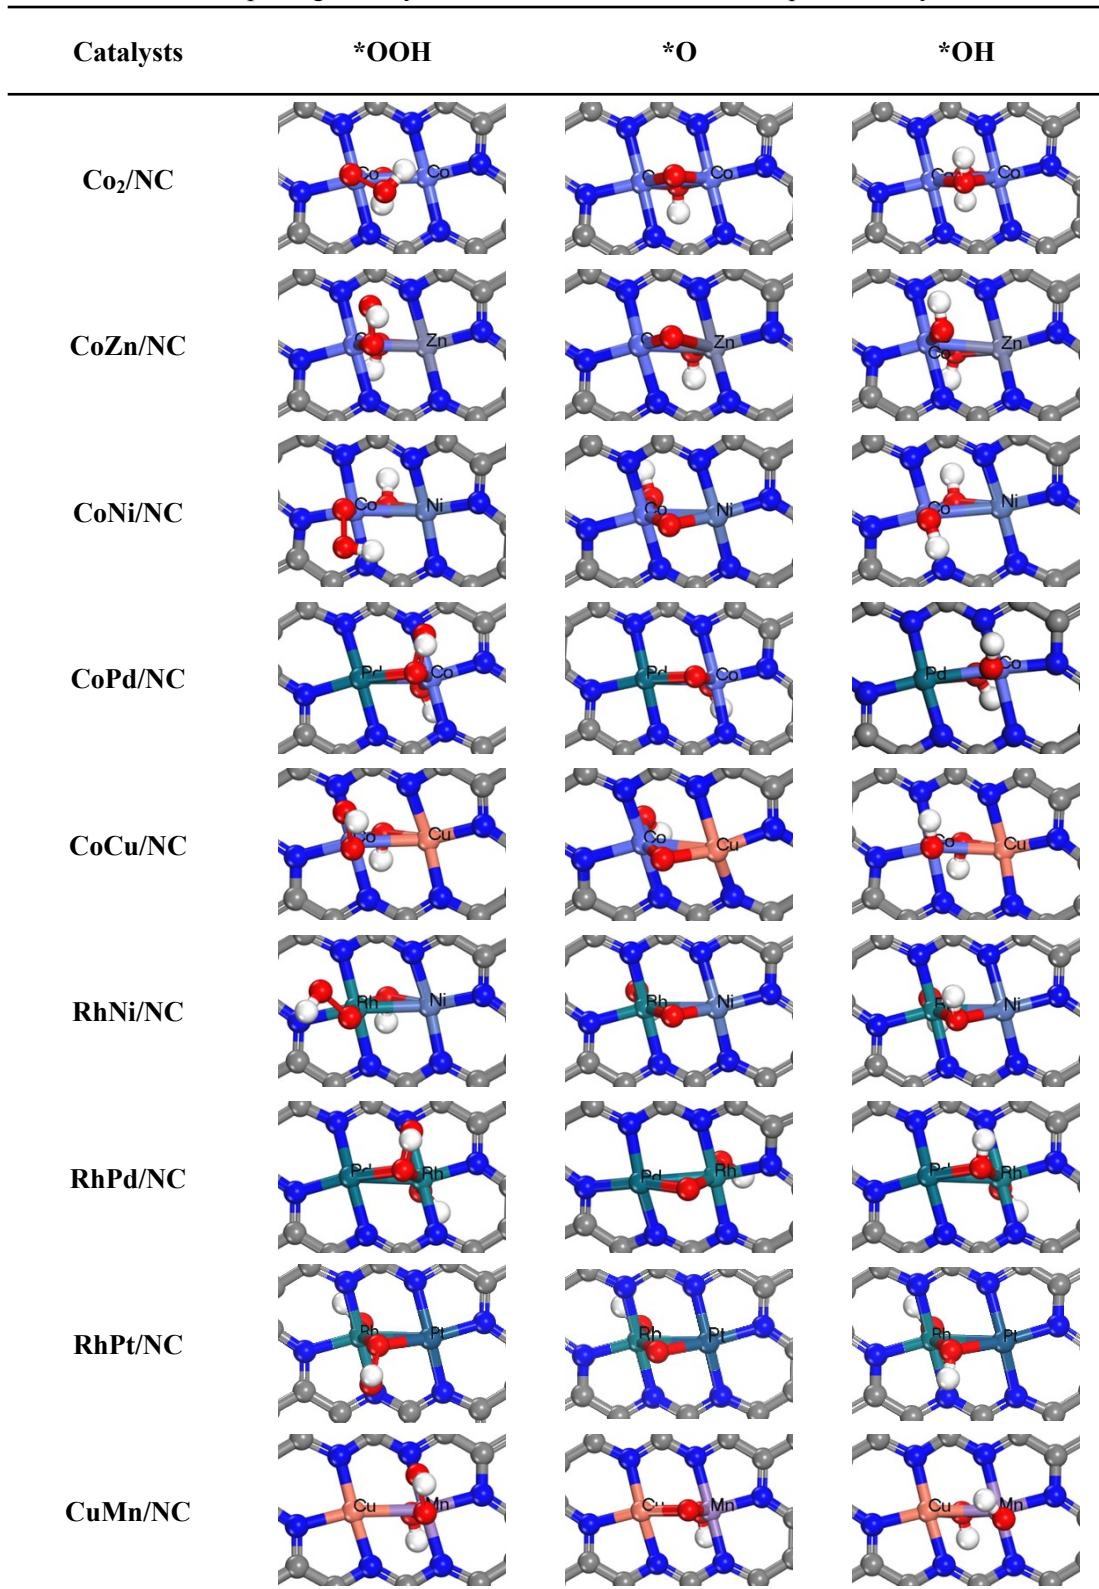

Table S4. Adsorption free energy (in eV) of oxygenated intermediates on different heteronuclear BACs and the corresponding limiting potential (in V).

| Catalysts | $\Delta G_{*OOH}$ | $\Delta G_{*O}$ | $\Delta G_{*OH}$ | $U_L$       |
|-----------|-------------------|-----------------|------------------|-------------|
| CoRh/NC   | 3.79              | 1.60            | 0.69             | 0.69        |
| CoRu/NC   | 3.44              | 0.68            | 0.58             | 0.11        |
| CoIr/NC   | 3.78              | 1.48            | 0.69             | 0.69        |
| CoFe/NC   | 3.50              | 0.75            | 0.23             | 0.23        |
| CoMn/NC   | 3.70              | 0.75            | 0.43             | 0.32        |
| CoZn/NC   | 3.94              | 1.88            | 0.80             | <b>0.80</b> |
| CoNi/NC   | 4.04              | 1.87            | 0.88             | <b>0.88</b> |
| CoPd/NC   | 4.03              | 1.75            | 0.84             | <b>0.84</b> |
| CoPt/NC   | 3.81              | 2.21            | 0.70             | 0.70        |
| CoCu/NC   | 4.14              | 2.14            | 1.05             | <b>0.78</b> |
| ZnRh/NC   | 4.78              | 2.30            | 1.20             | 0.14        |
| ZnRu/NC   | 3.12              | 0.85            | 0.16             | 0.16        |
| ZnIr/NC   | 4.41              | 1.84            | 0.85             | 0.51        |
| ZnFe/NC   | 3.85              | 1.58            | 0.66             | 0.66        |
| ZnMn/NC   | 3.74              | 1.29            | 0.47             | 0.47        |
| ZnNi/NC   | 4.20              | 2.60            | 1.14             | 0.72        |
| ZnPd/NC   | 4.52              | 3.57            | 1.11             | 0.40        |
| ZnPt/NC   | 4.37              | 3.45            | 0.96             | 0.55        |
| ZnCu/NC   | 4.67              | 3.63            | 1.58             | 0.25        |
| NiRh/NC   | 3.98              | 1.82            | 0.85             | <b>0.85</b> |
| NiRu/NC   | 3.61              | 0.99            | 0.40             | 0.40        |
| NiIr/NC   | 3.98              | 1.47            | 0.74             | 0.73        |
| NiFe/NC   | 3.56              | 1.01            | 0.45             | 0.45        |
| NiMn/NC   | 3.82              | 1.13            | 0.57             | 0.56        |
| NiPd/NC   | 4.36              | 3.00            | 1.25             | 0.56        |
| NiPt/NC   | 4.30              | 2.96            | 1.22             | 0.62        |
| NiCu/NC   | 4.48              | 2.76            | 1.34             | 0.44        |
| PdRh/NC   | 4.13              | 1.82            | 0.95             | <b>0.79</b> |
| PdRu/NC   | 3.81              | 1.13            | 0.62             | 0.51        |
| PdIr/NC   | 4.19              | 1.60            | 0.95             | 0.65        |
| PdFe/NC   | 3.90              | 1.24            | 0.74             | 0.50        |
| PdMn/NC   | 4.13              | 1.32            | 0.85             | 0.46        |
| PdPt/NC   | 4.64              | 2.23            | 1.69             | 0.28        |
| PdCu/NC   | 4.79              | 3.63            | 1.66             | 0.13        |
| PtRh/NC   | 4.02              | 1.62            | 0.81             | <b>0.81</b> |
| PtRu/NC   | 3.79              | 1.14            | 0.60             | 0.54        |
| PtIr/NC   | 4.12              | 1.47            | 0.86             | 0.60        |
| PtFe/NC   | 3.96              | 1.15            | 0.79             | 0.36        |
| PtMn/NC   | 3.84              | 1.09            | 0.82             | 0.27        |

|         |      |      |       |             |
|---------|------|------|-------|-------------|
| PtCu/NC | 4.74 | 3.59 | 1.61  | 0.18        |
| CuRh/NC | 3.68 | 2.13 | 0.55  | 0.55        |
| CuRu/NC | 3.23 | 1.05 | 0.15  | 0.15        |
| CuIr/NC | 3.48 | 1.66 | 0.33  | 0.33        |
| CuFe/NC | 3.71 | 1.64 | 0.60  | 0.60        |
| CuMn/NC | 3.95 | 1.69 | 0.82  | <b>0.82</b> |
| RhRu/NC | 2.95 | 0.72 | -0.09 | -0.09       |
| RhIr/NC | 3.62 | 1.20 | 0.52  | 0.52        |
| RhFe/NC | 3.40 | 1.40 | 0.30  | 0.30        |
| RhMn/NC | 3.54 | 1.08 | 0.28  | 0.28        |
| RuIr/NC | 2.85 | 0.44 | -0.20 | -0.20       |
| RuFe/NC | 2.13 | 0.75 | 0.55  | 0.20        |
| RuMn/NC | 1.87 | 0.51 | 0.47  | 0.04        |
| IrFe/NC | 3.37 | 1.49 | 0.26  | 0.26        |
| IrMn/NC | 3.50 | 1.40 | 0.25  | 0.25        |
| FeMn/NC | 3.30 | 0.33 | 0.03  | 0.03        |

Table S5. The formation energy (in eV) for two N-doped graphene geometry (reference to graphene and nitrogen).

|          | pyrroN3                                                                           | pyriN6                                                                             |
|----------|-----------------------------------------------------------------------------------|------------------------------------------------------------------------------------|
| geometry | 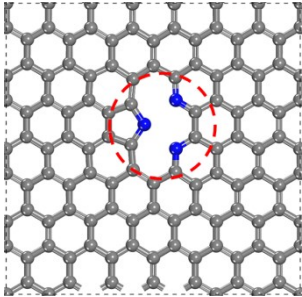 |  |
| $E'_r$   | 4.42                                                                              | 3.99                                                                               |

Table S6. The formation energy (in eV) for the nine promising BACs (reference to graphene and nitrogen).

| BACs   | Co <sub>2</sub> /NC | CoZn/NC | CoNi/NC | CoPd/NC | CoCu/NC |
|--------|---------------------|---------|---------|---------|---------|
| $E'_r$ | 2.68                | 2.40    | 2.34    | 2.54    | 2.39    |
| BACs   | RhNi/NC             | RhPd/NC | RhPt/NC | CuMn/NC |         |
| $E'_r$ | 2.80                | 3.30    | 3.26    | 2.34    |         |

Table S7. Summary of the distance of two metal atoms (M-M, Å), average distance between two metal atoms and the coordinated N atoms (M-N, Å), Radii of two metal atoms ( $R_1$  and  $R_2$ , pm), the outer electron number of two metal atoms ( $N_{e1}$  and  $N_{e2}$ ), the Pauling electronegativity of two atoms ( $P_1$  and  $P_2$ ), first ionization energy of two atoms ( $I_1$  and  $I_2$ , aJ) and electron affinity of two atoms ( $A_1$  and  $A_2$ , kJ/mol).

| Catalysts           | M-M   | M-N   | $R_1$ | $N_{e1}$ | $P_1$ | $I_1$ | $A_1$ | $R_2$ | $N_{e2}$ | $P_2$ | $I_2$ | $A_2$ |
|---------------------|-------|-------|-------|----------|-------|-------|-------|-------|----------|-------|-------|-------|
| Fe <sub>2</sub> /NC | 2.397 | 1.925 | 126   | 8        | 1.8   | 759.3 | 44    | 126   | 8        | 1.8   | 759.3 | 44    |
| Mn <sub>2</sub> /NC | 2.495 | 1.972 | 137   | 7        | 1.5   | 717.4 | -94   | 137   | 7        | 1.5   | 717.4 | -94   |
| Ir <sub>2</sub> /NC | 2.628 | 1.986 | 136   | 9        | 2.2   | 880   | 190   | 136   | 9        | 2.2   | 880   | 190   |
| Ru <sub>2</sub> /NC | 2.478 | 2.003 | 134   | 8        | 2.2   | 711   | 146   | 134   | 8        | 2.2   | 711   | 146   |
| Rh <sub>2</sub> /NC | 2.590 | 1.983 | 134   | 9        | 2.2   | 720   | 162   | 134   | 9        | 2.2   | 720   | 162   |
| Co <sub>2</sub> /NC | 2.532 | 1.883 | 125   | 9        | 1.9   | 760   | 102   | 125   | 9        | 1.9   | 760   | 102   |
| Zn <sub>2</sub> /NC | 2.629 | 2.014 | 137   | 12       | 1.6   | 906.4 | 9     | 137   | 12       | 1.6   | 906.4 | 9     |
| Ni <sub>2</sub> /NC | 2.685 | 1.887 | 125   | 10       | 1.9   | 736.7 | 156   | 125   | 10       | 1.9   | 736.7 | 156   |
| Pt <sub>2</sub> /NC | 2.579 | 1.998 | 139   | 10       | 2.2   | 870   | 247   | 139   | 10       | 2.2   | 870   | 247   |
| Pd <sub>2</sub> /NC | 2.599 | 1.997 | 137   | 10       | 2.2   | 805   | 98.4  | 137   | 10       | 2.2   | 805   | 98.4  |
| Cu <sub>2</sub> /NC | 2.515 | 1.968 | 128   | 11       | 1.9   | 745.4 | 118.3 | 128   | 11       | 1.9   | 745.4 | 118.3 |
| CoRh/NC             | 2.535 | 1.938 | 125   | 9        | 1.9   | 760   | 102   | 134   | 9        | 2.2   | 720   | 162   |
| CoRu/NC             | 2.455 | 1.955 | 125   | 9        | 1.9   | 760   | 102   | 134   | 8        | 2.2   | 711   | 146   |
| CoIr/NC             | 2.528 | 1.939 | 125   | 9        | 1.9   | 760   | 102   | 136   | 9        | 2.2   | 880   | 190   |
| CoFe/NC             | 2.294 | 1.931 | 125   | 9        | 1.9   | 760   | 102   | 126   | 8        | 1.8   | 759.3 | 44    |
| CoMn/NC             | 2.452 | 1.927 | 125   | 9        | 1.9   | 760   | 102   | 137   | 7        | 1.5   | 717.4 | -94   |
| CoZn/NC             | 2.595 | 1.941 | 125   | 9        | 1.9   | 760   | 102   | 137   | 12       | 1.6   | 906.4 | 9     |
| CoNi/NC             | 2.518 | 1.894 | 125   | 9        | 1.9   | 760   | 102   | 125   | 10       | 1.9   | 736.7 | 156   |
| CoPd/NC             | 2.512 | 1.942 | 125   | 9        | 1.9   | 760   | 102   | 137   | 10       | 2.2   | 805   | 98.4  |
| CoPt/NC             | 2.602 | 1.938 | 125   | 9        | 1.9   | 760   | 102   | 139   | 10       | 2.2   | 870   | 247   |
| CoCu/NC             | 2.445 | 1.915 | 125   | 9        | 1.9   | 760   | 102   | 128   | 11       | 1.9   | 745.4 | 118.3 |
| ZnRh/NC             | 2.583 | 2.003 | 137   | 12       | 1.6   | 906.4 | 9     | 134   | 9        | 2.2   | 720   | 162   |
| ZnRu/NC             | 2.593 | 2.005 | 137   | 12       | 1.6   | 906.4 | 9     | 134   | 8        | 2.2   | 711   | 146   |
| ZnIr/NC             | 2.579 | 1.996 | 137   | 12       | 1.6   | 906.4 | 9     | 136   | 9        | 2.2   | 880   | 190   |
| ZnFe/NC             | 2.610 | 1.960 | 137   | 12       | 1.6   | 906.4 | 9     | 126   | 8        | 1.8   | 759.3 | 44    |
| ZnMn/NC             | 2.640 | 1.978 | 137   | 12       | 1.6   | 906.4 | 9     | 137   | 7        | 1.5   | 717.4 | -94   |
| ZnNi/NC             | 2.593 | 1.957 | 137   | 12       | 1.6   | 906.4 | 9     | 125   | 10       | 1.9   | 736.7 | 156   |
| ZnPd/NC             | 2.647 | 2.005 | 137   | 12       | 1.6   | 906.4 | 9     | 137   | 10       | 2.2   | 805   | 98.4  |
| ZnPt/NC             | 2.634 | 1.997 | 137   | 12       | 1.6   | 906.4 | 9     | 139   | 10       | 2.2   | 870   | 247   |
| ZnCu/NC             | 2.536 | 2.015 | 137   | 12       | 1.6   | 906.4 | 9     | 128   | 11       | 1.9   | 745.4 | 118.3 |
| NiRh/NC             | 2.502 | 1.952 | 125   | 10       | 1.9   | 736.7 | 156   | 134   | 9        | 2.2   | 720   | 162   |
| NiRu/NC             | 2.464 | 1.953 | 125   | 10       | 1.9   | 736.7 | 156   | 134   | 8        | 2.2   | 711   | 146   |
| NiIr/NC             | 2.505 | 1.951 | 125   | 10       | 1.9   | 736.7 | 156   | 136   | 9        | 2.2   | 880   | 190   |
| NiFe/NC             | 2.477 | 1.912 | 125   | 10       | 1.9   | 736.7 | 156   | 126   | 8        | 1.8   | 759.3 | 44    |
| NiMn/NC             | 2.434 | 1.942 | 125   | 10       | 1.9   | 736.7 | 156   | 137   | 7        | 1.5   | 717.4 | -94   |

|         |       |       |     |    |     |       |       |     |    |     |       |       |
|---------|-------|-------|-----|----|-----|-------|-------|-----|----|-----|-------|-------|
| NiPd/NC | 2.659 | 1.940 | 125 | 10 | 1.9 | 736.7 | 156   | 137 | 10 | 2.2 | 805   | 98.4  |
| NiPt/NC | 2.634 | 1.942 | 125 | 10 | 1.9 | 736.7 | 156   | 139 | 10 | 2.2 | 870   | 247   |
| NiCu/NC | 2.492 | 1.917 | 125 | 10 | 1.9 | 736.7 | 156   | 128 | 11 | 1.9 | 745.4 | 118.3 |
| PdRh/NC | 2.528 | 1.994 | 137 | 10 | 2.2 | 805   | 98.4  | 134 | 9  | 2.2 | 720   | 162   |
| PdRu/NC | 2.505 | 2.002 | 137 | 10 | 2.2 | 805   | 98.4  | 134 | 8  | 2.2 | 711   | 146   |
| PdIr/NC | 2.529 | 1.995 | 137 | 10 | 2.2 | 805   | 98.4  | 136 | 9  | 2.2 | 880   | 190   |
| PdFe/NC | 2.509 | 1.963 | 137 | 10 | 2.2 | 805   | 98.4  | 126 | 8  | 1.8 | 759.3 | 44    |
| PdMn/NC | 2.376 | 1.934 | 137 | 10 | 2.2 | 805   | 98.4  | 137 | 7  | 1.5 | 717.4 | -94   |
| PdPt/NC | 2.582 | 1.996 | 137 | 10 | 2.2 | 805   | 98.4  | 139 | 10 | 2.2 | 870   | 247   |
| PdCu/NC | 2.557 | 1.973 | 137 | 10 | 2.2 | 805   | 98.4  | 128 | 11 | 1.9 | 745.4 | 118.3 |
| PtRh/NC | 2.531 | 1.999 | 139 | 10 | 2.2 | 870   | 247   | 134 | 9  | 2.2 | 720   | 162   |
| PtRu/NC | 2.482 | 2.001 | 139 | 10 | 2.2 | 870   | 247   | 134 | 8  | 2.2 | 711   | 146   |
| PtIr/NC | 2.529 | 2.335 | 139 | 10 | 2.2 | 870   | 247   | 136 | 9  | 2.2 | 880   | 190   |
| PtFe/NC | 2.428 | 2.003 | 139 | 10 | 2.2 | 870   | 247   | 126 | 8  | 1.8 | 759.3 | 44    |
| PtMn/NC | 2.437 | 1.998 | 139 | 10 | 2.2 | 870   | 247   | 137 | 7  | 1.5 | 717.4 | -94   |
| PtCu/NC | 2.546 | 1.965 | 139 | 10 | 2.2 | 870   | 247   | 128 | 11 | 1.9 | 745.4 | 118.3 |
| CuRh/NC | 2.500 | 1.964 | 128 | 11 | 1.9 | 745.4 | 118.3 | 134 | 9  | 2.2 | 720   | 162   |
| CuRu/NC | 2.539 | 1.961 | 128 | 11 | 1.9 | 745.4 | 118.3 | 134 | 8  | 2.2 | 711   | 146   |
| CuIr/NC | 2.499 | 1.963 | 128 | 11 | 1.9 | 745.4 | 118.3 | 136 | 9  | 2.2 | 880   | 190   |
| CuFe/NC | 2.484 | 1.924 | 128 | 11 | 1.9 | 745.4 | 118.3 | 126 | 8  | 1.8 | 759.3 | 44    |
| CuMn/NC | 2.498 | 1.954 | 128 | 11 | 1.9 | 745.4 | 118.3 | 137 | 7  | 1.5 | 717.4 | -94   |
| RhRu/NC | 2.570 | 1.986 | 134 | 9  | 2.2 | 720   | 162   | 134 | 8  | 2.2 | 711   | 146   |
| RhIr/NC | 2.601 | 1.984 | 134 | 9  | 2.2 | 720   | 162   | 136 | 9  | 2.2 | 880   | 190   |
| RhFe/NC | 2.506 | 1.952 | 134 | 9  | 2.2 | 720   | 162   | 126 | 8  | 1.8 | 759.3 | 44    |
| RhMn/NC | 2.448 | 1.983 | 134 | 9  | 2.2 | 720   | 162   | 137 | 7  | 1.5 | 717.4 | -94   |
| RuIr/NC | 2.569 | 1.985 | 134 | 8  | 2.2 | 711   | 146   | 136 | 9  | 2.2 | 880   | 190   |
| RuFe/NC | 2.305 | 1.985 | 134 | 8  | 2.2 | 711   | 146   | 126 | 8  | 1.8 | 759.3 | 44    |
| RuMn/NC | 2.388 | 1.992 | 134 | 8  | 2.2 | 711   | 146   | 137 | 7  | 1.5 | 717.4 | -94   |
| IrFe/NC | 2.496 | 1.953 | 136 | 9  | 2.2 | 880   | 190   | 126 | 8  | 1.8 | 759.3 | 44    |
| IrMn/NC | 2.443 | 1.984 | 136 | 9  | 2.2 | 880   | 190   | 137 | 7  | 1.5 | 717.4 | -94   |
| FeMn/NC | 2.489 | 1.931 | 126 | 8  | 1.8 | 759.3 | 44    | 137 | 7  | 1.5 | 717.4 | -94   |

Table S8. The M-M distance in homonuclear BACs and the corresponding values in bulk metals (in Å).

| Metal | Distance (bulk) | Distance (BACs) | Metal | Distance (bulk) | Distance (BACs) |
|-------|-----------------|-----------------|-------|-----------------|-----------------|
| Mn    | 2.705/2.611     | 2.495           | Ru    | 2.706/2.650     | 2.478           |
| Fe    | 2.866/2.482     | 2.397           | Rh    | 3.804/2.690     | 2.590           |
| Co    | 2.507/2.497     | 2.532           | Pd    | 3.891/2.751     | 2.599           |
| Ni    | 3.524/2.492     | 2.685           | Ir    | 3.839/2.715     | 2.628           |
| Cu    | 3.615/2.556     | 2.515           | Pt    | 3.924/2.775     | 2.579           |
| Zn    | 2.913/2.665     | 2.629           |       |                 |                 |

Note: The two values in bulk phase denote the longest and shortest adjacent M-M distance, respectively.
